# Supplementary material
Source: PubMed Central journal article supplement (PMC1174974)

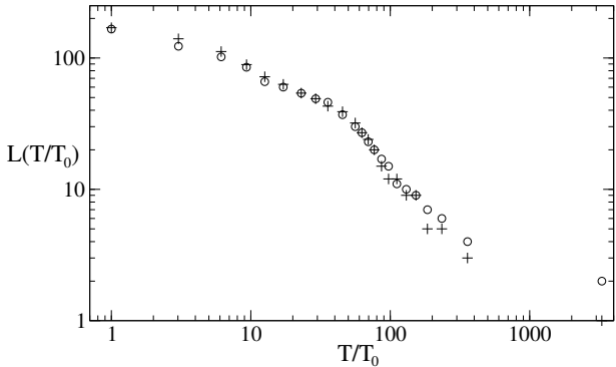

Supplement: pnas_0408471102_1.pdf [file pnas_0408471102_1.pdf]

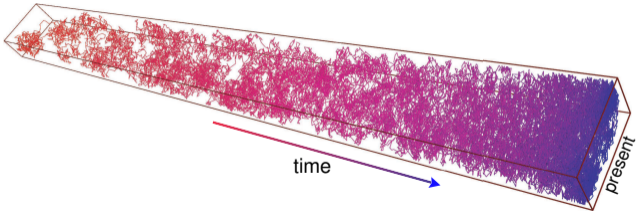

Supplement: pnas_0408471102_2.pdf [file pnas_0408471102_2.pdf]

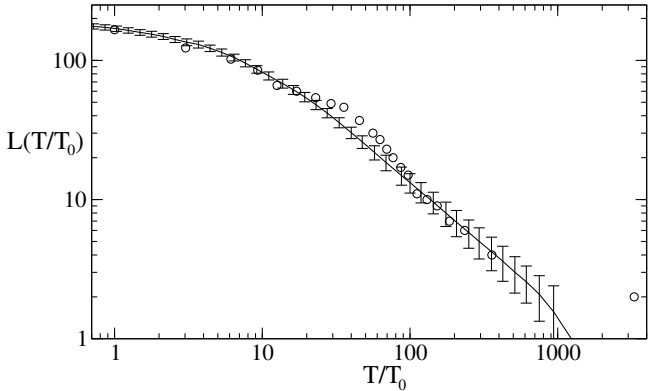

Supplement: pnas_0408471102_3.pdf [file pnas_0408471102_3.pdf]

(a)

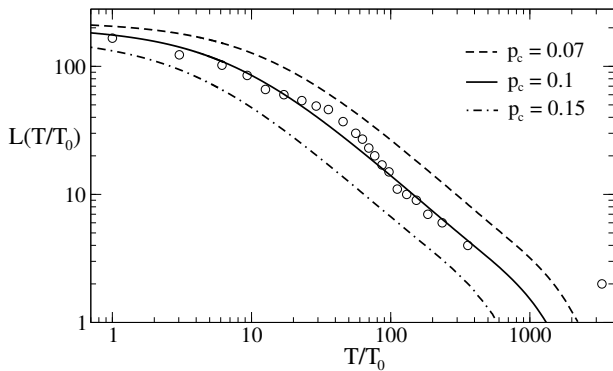

(b)

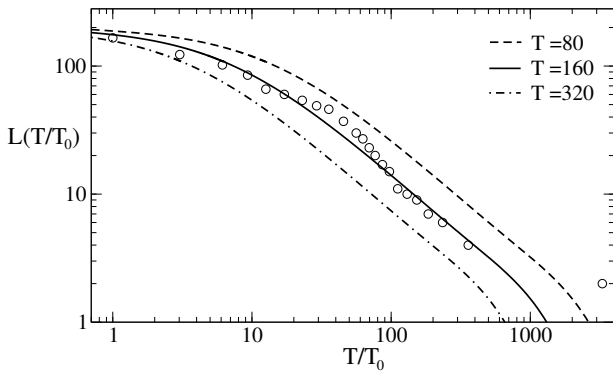

Supplement: pnas_0408471102_4.pdf [file pnas_0408471102_4.pdf]

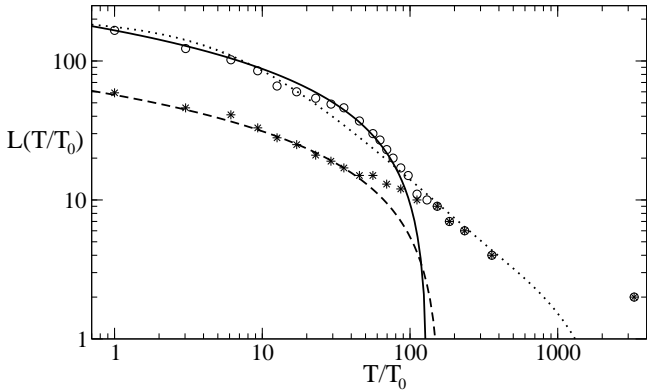

Supplement: pnas_0408471102_5.pdf [file pnas_0408471102_5.pdf]
